# Supplementary material for: Developing a Reliable Welfare Assessment Tool for Captive Hibernatory Bear Species
Source: MDPI journal article supplement (doi:10.3390/ani11113090), 2021-10-29
Supplement: s1 [file s1]

## Bear welfare assessment guide

### Visual assessment

Please note any abnormality e.g. discharges, wounds, damage to tissue, hairloss, etc

|                                                                                    | Comments:                                                                           |
|------------------------------------------------------------------------------------|-------------------------------------------------------------------------------------|
| Eyes                                                                               |                                                                                     |
| Nose                                                                               |                                                                                     |
| Teeth                                                                              |                                                                                     |
| Skin                                                                               |                                                                                     |
| Haircoat                                                                           |                                                                                     |
| Claws                                                                              |                                                                                     |
| Footpads                                                                           |                                                                                     |
| Injuries/wounds                                                                    |                                                                                     |
| Skin condition and wounds (please note):                                           |                                                                                     |
| 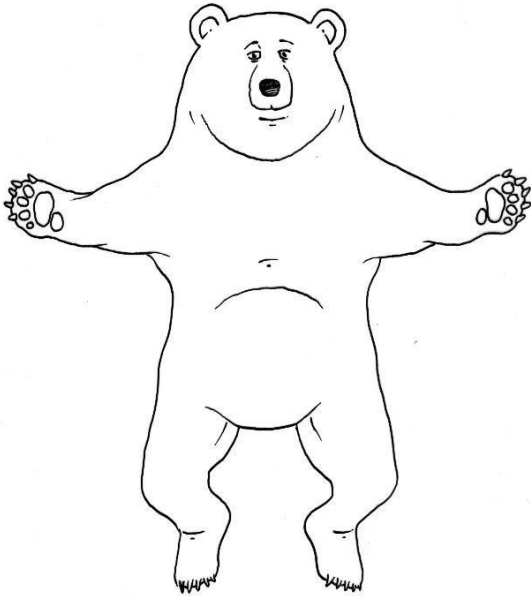 |  |
| Courtesy of AnimalsAsia.org                                                        |                                                                                     |

## Body Condition score

| 1                                                                                                                                              | 2                                                                                                                                                                             | 3                                                                                                                                                | 4                                                                                                                          | 5                                                                                                                               | 6                                                                                                                                                       | 7                                                                                                                    | 8                                                                                                                                                                       | 9                                                                                                       |
|------------------------------------------------------------------------------------------------------------------------------------------------|-------------------------------------------------------------------------------------------------------------------------------------------------------------------------------|--------------------------------------------------------------------------------------------------------------------------------------------------|----------------------------------------------------------------------------------------------------------------------------|---------------------------------------------------------------------------------------------------------------------------------|---------------------------------------------------------------------------------------------------------------------------------------------------------|----------------------------------------------------------------------------------------------------------------------|-------------------------------------------------------------------------------------------------------------------------------------------------------------------------|---------------------------------------------------------------------------------------------------------|
| Emaciated. Pelvis and scapulae protruding, ribs visible. A deep hollow will be noted between the pelvis and last rib showing virtually no fat. | Pelvis easily visible, and scapulae still noticeable. Last rib still visible, but ribs have some muscle covering them. The hollow between the pelvis and last rib is obvious. | Pelvis easily visible, ribs no longer visible, having some muscle covering them. The hollow between the pelvis and last rib obvious, but softer. | Slight angle to pelvis, but otherwise body is fully fleshed. The hollow between the pelvis and last rib is small and soft. | Body is fully fleshed out. Some fat is present over pelvis and shoulders. The hollow between the pelvis and last rib is absent. | Body is fully fleshed out. Obvious fat is present over pelvis and shoulders, ribs cannot be seen. The hollow between the pelvis and last rib is absent. | Bear has a rounded or blocky appearance, very well fleshed over all bony areas, obvious fat over rump and shoulders. | Bear has an obvious blocky appearance, very well fleshed over all areas. Obvious fat over rump and shoulders. May have mammary, hindlimb fat causing 'saggy' appearance | Legs appear too short for the body, rolls of fat on neck and lower shoulders. Obvious fat under abdomen |

### Mobility Assessment (Hindlimb):

| No |                      | Description                                                                                                        |
|----|----------------------|--------------------------------------------------------------------------------------------------------------------|
| 1  | Good easy Full Stand | Straight up to standing position, no hesitation, hind limbs straight.                                              |
| 2  | Full Stand           | Slow and stiff but did full stand                                                                                  |
| 3  | Half Stand           | Managed to stand with front limbs half way up the bars but hind legs straight.                                     |
| 4  | Pull up              | Sat on ground and pulled up to standing position with front limbs                                                  |
| 5  | Squatting/Teddy bear | In upright position but either squatting with hindlimbs or sitting in 'teddy-bear' position with hindlimbs forward |
| 6  | No stand             | Tried to stand but could not.                                                                                      |

### Gait Assessment (Cincinnati, adapted):

Please tell us what specific activities have become most troublesome to you or your bear

|  | 0 No Problem | 1 A little bit difficult | 2 Quite difficult | 3 very difficult | 4 Impossible |
|--|--------------|--------------------------|-------------------|------------------|--------------|
|  |              |                          |                   |                  |              |
|  |              |                          |                   |                  |              |
|  |              |                          |                   |                  |              |
|  |              |                          |                   |                  |              |
|  |              |                          |                   |                  |              |

|                                                | 0 No Problem | 1 A little bit difficult | 2 Quite difficult | 3 very difficult | 4 Impossible |
|------------------------------------------------|--------------|--------------------------|-------------------|------------------|--------------|
| Walking                                        |              |                          |                   |                  |              |
| Running                                        |              |                          |                   |                  |              |
| Jumping/wrestling                              |              |                          |                   |                  |              |
| Getting up                                     |              |                          |                   |                  |              |
| Lying down                                     |              |                          |                   |                  |              |
| Climbing up (enclosure furnishings, steps etc) |              |                          |                   |                  |              |
| Descending (enclosure furnishings, steps etc)  |              |                          |                   |                  |              |
| Posturing to urinate or defecate               |              |                          |                   |                  |              |

$$\text{Transformed Scale/ 100} = \frac{\text{Actual Score} \times 100}{\text{Possible Score}}$$
